# Supplementary material for: Searching biomedical databases on complementary medicine: the use of controlled vocabulary among authors, indexers and investigators
Source: Springer Nature journal article supplement (doi:10.1186/1472-6882-3-3), 2003-07-07
Supplement: Additional file 1 [file 1472-6882-3-3-s1.doc]

**Appendix I: 38 studies that met the inclusion criteria for testing the validity of spinal palpation**

- Beal M, Dvorak J. Palpatory examination of the spine: a comparison of the results of two methods and their relationship to visceral disease. *Manual Medicine.* 1984;1(2):25-32.
- Beal MC, Kleiber GE. Somatic dysfunction as a predictor of coronary artery disease. *J Am Osteopath Assoc.* May 1985;85(5):302-307.
- Beal MC, Vorro J, Johnston WL. Chronic cervical dysfunction: correlation of myoelectric findings with clinical progress. *J Am Osteopath Assoc.* Jul 1989;89(7):891-900.
- Braun B, Schiffman EL. The validity and predictive value of four assessment instruments for evaluation of the cervical and stomatognathic systems. *J Craniomandib Disord.* Fall 1991;5(4):239-244.
- Brunarski DJ. Chiropractic biomechanical evaluations: validity in myofascial low back pain. *J Manipulative Physiol Ther.* Dec 1982;5(4):155-161.
- Byfield D, Mathisasen J. A Preliminary Study Investigating the Accuracy of Bony Landmark Identification in the Lumbar Spine. *European Journal Of Chiropractic.* 1991;39(3):105-109.
- Cox JM, Gorbis S, Dick LM, Rogers JC, Rogers FJ. Palpable musculoskeletal findings in coronary artery disease: results of a double-blind study. *J Am Osteopath Assoc.* Jul 1983;82(11):832-836.
- Dott GA, Hart CL, McKay C. Predictability of sacral base levelness based on iliac crest measurements. *J Am Osteopath Assoc.* May 1994;94(5):383-390.
- Drerup B, Hierholzer E. Objective determination of anatomical landmarks on the body surface: measurement of the vertebra prominens from surface curvature. *J Biomech.* 1985;18(6):467-474.
- Ebraheim NA, Inzerillo C, Xu R. Are anatomic landmarks reliable in determination of fusion level in posterolateral lumbar fusion? *Spine.* 1999;24(10):973-974.
- Gracovetsky SA, Newman NM, Richards MP, Asselin S, Lanzo VF, Marriott A. Evaluation of clinician and machine performance in the assessment of low back pain. *Spine.* Mar 1 1998;23(5):568-575.
- Gregory P, Hayek R, Mann-Hayek A. Correlating motion palpation with functional X-ray findings in patients with low back pain. *Australasian Chiropractic & Osteopathy.* 1998;7(1):15-19.
- Haas M, Panzer D, Peterson D, Raphael R. Short-Term Responsiveness of Manual Thoracic End-Play Assessment to Spinal Manipulation: A Randomized Controlled Trial of Construct Validity. *Journal Of Manipulative And Physiological Therapeutics.* 1995;18(9):582-589.
- Haas M, Peterson D, Hoyer D, Ross G. Muscle testing response to provocative vertebral challenge and spinal manipulation: a randomized controlled trial of construct validity. *J Manipulative Physiol Ther.* Mar-Apr 1994;17(3):141-148.
- Harvey D, Byfield D. Preliminary Studies with a Mechanical Model for the Evaluation of Spinal Motion Palpation. *Clinical Biomechanics.* 1991;6(2):79-82.
- Jende A, Peterson CK. Validity of static palpation as an indicator of atlas transverse process asymmetry. *European Journal of Chiropractic.* 1997;45(2):35-42.
- Jensen K, Gemmell H, Thiel H. Motion Palpation Accuracy Using a Mechanical Spinal Model. *European Journal Of Chiropractic.* 1993;41:67-73.
- Johnston WL, Vorro J, Hubbard RP. Clinical/biomechanic correlates for cervical function: Part I. A kinematic study. *J Am Osteopath Assoc.* Jul 1985;85(7):429-437.
- Jull G, Bogduk N, Marsland A. The accuracy of manual diagnosis for cervical zygapophysial joint pain syndromes. *Med J Aust.* Mar 7 1988;148(5):233-236.
- Jull G, Treleaven J, Versace G. Manual examination: is pain provocation a major cue for spinal dysfunction. *Australian Physiotherapy.* 1994;40(3):159-165.
- Kristiansson P, Svardsudd K. Discriminatory power of tests applied in back pain during pregnancy. *Spine.* Oct 15 1996;21(20):2337-2343; discussion 2343-2334.
- Leboeuf-Yde C, Kyvik KO. Is it possible to differentiate people with or without low-back pain on the basis of tests of lumbopelvic dysfunction? *J. Manipulative Physiol Ther.* 2000;23(3):160-167.
- Lundberg G, Gerdle B. The relationships between spinal sagittal configuration, joint mobility, general low back mobility and segmental mobility in female homecare personnel. *Scand J Rehabil Med.* 1999;31(4):197-206.
- Maher CG, Latimer J, Adams R. An investigation of the reliability and validity of posteroanterior spinal stiffness judgments made using a reference-based protocol. *Physical Therapy.* 1998;78(8):829-837.
- McPartland JM, Goodridge JP. Counterstrain and traditional osteopathic examination of the cervical spine compared. *Journal of Bodywork & Movement Therapies.* 1997;1(3):173-178.
- Mennell J. The validation of the diagnosis "joint dysfunction" in the synovial joints of the cervical spine. *Journal Of Manipulative And Physiological Therapeutics.* 1990;13(1):7-12.
- Nansel DD, Jansen RD. Concordance between galvanic skin response and spinal palpation findings in pain-free males. *J Manipulative Physiol Ther.* Aug 1988;11(4):267-272.
- Olson KA, Paris SV, Spohr C, Gorniak G. Radiographic assessment and reliability study of the craniovertebral sidebending test. *Journal of Manual & Manipulative Therapy.* 1998;6(2):87-96.
- Olson SL, O'Connor DP, Birmingham G, Broman P, Herrera L. Tender point sensitivity, range of motion, and perceived disability in subjects with neck pain. *J Orthop Sports Phys Ther.* Jan 2000;30(1):13-20.
- Phillips DR, Twomey LT. A comparison of manual diagnosis with a diagnosis established by a uni-level lumbar spinal block procedure... this study was presented in part at the 8th Biennial Conference of the MPAA, in 1993. *Manual Therapy.* 1996;1(2):82-87.
- Sandmark H, Nisell R. Validity of five common manual neck pain provoking tests. *Scand J Rehabil Med.* 1995;27(3):131-136.
- Swerdlow B, Dieter JN. An evaluation of the sensitivity and specificity of medical thermography for the documentation of myofascial trigger points. *Pain.* Feb 1992;48(2):205-213.
- Tarr R, Feely R, Richardson D. A controlled study of palpatory diagnostic procedures: assessment of sensitivity and specificity. *Journal Of American Osteopathic Association.* 1987;87(4):296-302.
- Viikari-Juntura E, Takala EP, Riihimaki H, Malmivaara A, Martikainen R, Jappinen P. Standardized physical examination protocol for low back disorders: feasibility of use and validity of symptoms and signs. *J Clin Epidemiol.* Mar 1998;51(3):245-255.
- Visscher CM, Lobbezoo F, de Boer W, van der Zaag J, Verheij JG, Naeije M. Clinical tests in distinguishing between persons with or without craniomandibular or cervical spinal pain complaints. *Eur J Oral Sci.* Dec 2000;108(6):475-483.
- Vorro J, Johnston WL. Clinical biomechanic correlates for cervical function: Part II. A myoelectric study. *J Am Osteopath Assoc.* May 1987;87(5):353-367.
- Vorro J, Johnston WL. Clinical biomechanic correlates of cervical dysfunction: Part 4. Altered regional motor behavior. *J Am Osteopath Assoc.* Jun 1998;98(6):317-323.
- Vorro J, Johnston WL, Hubbard RP. Clinical biomechanic correlates for cervical function: Part III. Intermittent secondary movements. *J Am Osteopath Assoc.* Feb 1991;91(2):145-146, 149-155.
